# Supplementary material for: Causal inference for heritable phenotypic risk factors using heterogeneous genetic instruments
Source: PubMed Central journal article supplement (PMC8301661; doi:10.1371/journal.pgen.1009575), 2021-06-22
Supplement: pgen.1009575.s008.pdf [file pgen.1009575.s008.pdf]

## S2 Text: Additional mathematical details

### Correlations of GWAS summary statistics from overlapping cohorts

We provide detailed calculations for the derivation of Equation (8) in the maintext.:

$$\text{Corr} [\widehat{\Gamma}_j, \widehat{\gamma}_{jk}] \approx \frac{N_{sk}}{\sqrt{N_{ek}N_o}} \text{Corr} [Y_s, X_{ks}].$$

For any shared sample  $s$ , let

$$Y_s = \Gamma_j Z_{js} + \epsilon_{js}, \quad X_{ks} = \gamma_{jk} Z_{js} + e_{jks}$$

where  $Y_s$ ,  $X_{ks}$  and  $Z_{js}$  all have mean 0 and the  $Z_{js}$  has variance 1 for convenience. Then as for most SNPs, its individual genetic effect is very small, with  $\Gamma_j = o(1)$  and  $\gamma_{jk} = o(1)$  we have

$$\text{Cov} [Y_s, X_{ks}] = \Gamma_j \gamma_{jks} \text{Var} [Z_{js}] + \text{Cov} [\epsilon_{js}, e_{jks}] \approx \text{Cov} [\epsilon_{js}, e_{jks}]$$

The summary statistics are computed from marginal regression, so we have

$$\widehat{\gamma}_j = \frac{\widehat{\text{Cov}}_{n_X}(X, Z_j)}{\widehat{\text{Cov}}_{n_X}(Z_j, Z_j)} = \widehat{\text{Cov}}_{n_X}(X, Z_j), \quad \widehat{\Gamma}_j = \frac{\widehat{\text{Cov}}_{n_Y}(Y, Z_j)}{\widehat{\text{Cov}}_{n_Y}(Z_j, Z_j)} = \widehat{\text{Cov}}_{n_Y}(Y, Z_j).$$

where  $\widehat{\text{Cov}}_n$  is the sample covariance operator.

Thus,

$$\begin{aligned} \text{Cov} [\widehat{\Gamma}_j, \widehat{\gamma}_{jk}] &= \frac{1}{N_{ek}N_o} \text{Cov} \left[ \sum_{s=1}^{N_{sk}} Y_s Z_{js}, \sum_{s=1}^{N_{sk}} X_{sk} Z_{js} \right] \\ &= \frac{N_{sk}}{N_{ek}N_o} \text{Cov} [Y_s Z_{js}, X_{sk} Z_{js}] \\ &= \frac{N_{sk}}{N_{ek}N_o} (\Gamma_j \gamma_{jk} \text{Var} [Z_{js}^2] + \text{Var} [Z_{js}] \text{Cov} [\epsilon_{js}, e_{jks}]) \\ &\approx \frac{N_{sk}}{N_{ek}N_o} \text{Var} [Z_{js}] \text{Cov} [\epsilon_{js}, e_{jks}] \end{aligned}$$

and

$$\begin{aligned} \text{Var} [\widehat{\Gamma}_j] &= \frac{1}{N_o} \text{Var} [Y_s Z_{js}] \approx \frac{1}{N_o} \text{Var} [Z_{js}] \text{Var} [\epsilon_{js}] \\ \text{Var} [\widehat{\gamma}_{jk}] &= \frac{1}{N_{ek}} \text{Var} [Y_s Z_{js}] \approx \frac{1}{N_{ek}} \text{Var} [Z_{js}] \text{Var} [e_{jks}] \\ \text{Var} [Y_s] &\approx \text{Var} [\epsilon_{js}], \quad \text{Var} [X_{ks}] \approx \text{Var} [e_{jks}] \end{aligned}$$

Above approximations show that

$$\text{Corr} [\widehat{\Gamma}_j, \widehat{\gamma}_{jk}] \approx \frac{N_{sk}}{\sqrt{N_{ek}N_o}} \text{Corr} [Y_s, X_{ks}]$$

## Robustified profile likelihood methods for multivariate MR

With the random effect model on  $\alpha_j$ , we further have

$$\begin{pmatrix} \widehat{\Gamma}_j \\ \widehat{\gamma}_j \end{pmatrix} \sim \mathcal{N} \left( \begin{pmatrix} \gamma_j^T \boldsymbol{\beta} \\ \gamma_j \end{pmatrix}, \text{diag} \begin{pmatrix} \sigma_{Y_j} \\ \sigma_{X_j} \end{pmatrix} \Sigma \text{diag} \begin{pmatrix} \sigma_{Y_j} \\ \sigma_{X_j} \end{pmatrix} + \begin{pmatrix} \tau^2 & \mathbf{0} \\ \mathbf{0} & \mathbf{0} \end{pmatrix} \right)$$

Then, we estimate the parameters  $\boldsymbol{\beta}$  and  $\tau^2$  using  $K + 1$  estimation equations. Recall that we have defined

$$t_j(\boldsymbol{\beta}, \tau^2) = \frac{\widehat{\Gamma}_j - \widehat{\gamma}_j^T \boldsymbol{\beta}}{\sqrt{\sigma_{Y_j}^2 + \boldsymbol{\beta}^T \Sigma_{\mathbf{X}_j} \boldsymbol{\beta} - 2\boldsymbol{\beta}^T \Sigma_{\mathbf{X}_j Y_j} + \tau^2}} \quad (1)$$

and the robust profile likelihood is the optimization function

$$l(\boldsymbol{\beta}, \tau^2) = - \sum_j l_j(\boldsymbol{\beta}, \tau^2) = - \sum_j \rho(t_j(\boldsymbol{\beta}, \tau^2)) \quad (2)$$

The estimation equations for  $\boldsymbol{\beta}$  are from the derivatives of the robust profile likelihood:

$$\boldsymbol{\varphi}_1(\boldsymbol{\beta}, \tau^2) = \frac{\partial l(\boldsymbol{\beta}, \tau^2)}{\partial \boldsymbol{\beta}} = \mathbf{0}$$

The estimation equation for  $\tau^2$  is

$$\boldsymbol{\varphi}_2(\boldsymbol{\beta}, \tau^2) = l(\boldsymbol{\beta}, \tau^2) - p\eta = 0$$

where  $\eta = \mathbb{E}[\rho(Z)]$  with  $Z \sim \mathcal{N}(0, 1)$ . Let  $\boldsymbol{\varphi}(\cdot) = \begin{pmatrix} \boldsymbol{\varphi}_1(\cdot) \\ \boldsymbol{\varphi}_2(\cdot) \end{pmatrix}$ .

We use delta method to calculate the asymptotic distribution of  $\widehat{\boldsymbol{\beta}}$  and  $\widehat{\tau}^2$  obtained from the above estimation equations. To make it clear, we denote the true values of  $\boldsymbol{\beta}$  and  $\tau$  as  $\boldsymbol{\beta}_0$  and  $\tau_0$ . Then, we have

$$\mathbf{0} = \boldsymbol{\varphi}(\widehat{\boldsymbol{\beta}}, \widehat{\tau}^2) \approx \boldsymbol{\varphi}(\boldsymbol{\beta}_0, \tau_0^2) + \dot{\boldsymbol{\varphi}}(\boldsymbol{\beta}_0, \tau_0^2) \begin{pmatrix} \widehat{\boldsymbol{\beta}} - \boldsymbol{\beta}_0 \\ \widehat{\tau}_0^2 - \tau_0^2 \end{pmatrix}$$

Let

$$A = \mathbb{E}[-\dot{\boldsymbol{\varphi}}(\boldsymbol{\beta}_0, \tau_0^2)], \quad B = \text{Var}[\boldsymbol{\varphi}(\boldsymbol{\beta}_0, \tau_0^2)]$$

Then if  $\widehat{\boldsymbol{\beta}}$  and  $\widehat{\tau}^2$  are consistent estimates, we would have asymptotically

$$\begin{pmatrix} \widehat{\boldsymbol{\beta}} - \boldsymbol{\beta}_0 \\ \widehat{\tau}_0^2 - \tau_0^2 \end{pmatrix} \sim \mathcal{N}(0, A^{-1}BA^{-T})$$

Thus, we only need to estimate  $A$  and  $B$ .

Let's first discuss how to estimate  $B$ . Notice that

$$\boldsymbol{\varphi}_{1j}(\boldsymbol{\beta}, \tau^2) = \rho'(t_j) \frac{\partial t_j}{\partial \boldsymbol{\beta}}.$$

Based on the definition of  $t_j$  in (1), we have

$$\frac{\partial t_j}{\partial \boldsymbol{\beta}} = - \frac{(\sigma_{Y_j}^2 + \boldsymbol{\beta}^T \Sigma_{X_j} \boldsymbol{\beta} - 2\boldsymbol{\beta}^T \Sigma_{X_j Y_j} + \tau^2) \hat{\boldsymbol{\gamma}}_j + (\hat{\Gamma}_j - \hat{\boldsymbol{\gamma}}_j^T \boldsymbol{\beta})(\Sigma_{X_j} \boldsymbol{\beta} - \Sigma_{X_j Y_j})}{\left(\sigma_{Y_j}^2 + \boldsymbol{\beta}^T \Sigma_{X_j} \boldsymbol{\beta} - 2\boldsymbol{\beta}^T \Sigma_{X_j Y_j} + \tau^2\right)^{3/2}}$$

As

$$\text{Var} \left( \hat{\Gamma}_j - \hat{\boldsymbol{\gamma}}_j^T \boldsymbol{\beta}_0 \right) = \sigma_{Y_j}^2 + \boldsymbol{\beta}_0^T \Sigma_{X_j} \boldsymbol{\beta}_0 - 2\boldsymbol{\beta}_0^T \Sigma_{X_j Y_j} + \tau_0^2$$

and

$$\text{Cov} \left( \hat{\boldsymbol{\gamma}}_j, \hat{\Gamma}_j - \hat{\boldsymbol{\gamma}}_j^T \boldsymbol{\beta}_0 \right) = \Sigma_{X_j Y_j} - \Sigma_{X_j} \boldsymbol{\beta}_0$$

We have,

$$\text{Cov} \left( t_j, \frac{\partial t_j}{\partial \boldsymbol{\beta}} \right) = 0$$

at the true values  $\boldsymbol{\beta}_0$  and  $\tau_0$ . Further because  $t_j$  and  $\frac{\partial t_j}{\partial \boldsymbol{\beta}}$  are linear transformations of  $\hat{\Gamma}_j$  and  $\hat{\boldsymbol{\gamma}}_j$ , they are jointly Gaussian. Thus,  $t_j$  and  $\frac{\partial t_j}{\partial \boldsymbol{\beta}}$  are independent at the true values  $\boldsymbol{\beta}_0$  and  $\tau_0$ . So we have

$$\begin{aligned} \text{Var} [\boldsymbol{\varphi}_1(\boldsymbol{\beta}_0, \tau_0^2)] &= \sum_j \text{Var} [\boldsymbol{\varphi}_{1j}(\boldsymbol{\beta}_0, \tau_0^2)] \\ &= \sum_j \mathbb{E} [\boldsymbol{\varphi}_{1j}(\boldsymbol{\beta}_0, \tau_0^2)^2] \\ &= \sum_j \mathbb{E} [\rho'(t_j(\boldsymbol{\beta}_0, \tau_0^2))^2] \mathbb{E} \left[ \frac{\partial t_j}{\partial \boldsymbol{\beta}}(\boldsymbol{\beta}_0, \tau_0^2) \frac{\partial t_j}{\partial \boldsymbol{\beta}}(\boldsymbol{\beta}_0, \tau_0^2)^T \right] \\ &= \mathbb{E} [\rho'(Z)^2] \sum_j \mathbb{E} \left[ \frac{\partial t_j}{\partial \boldsymbol{\beta}}(\boldsymbol{\beta}_0, \tau_0^2) \frac{\partial t_j}{\partial \boldsymbol{\beta}}(\boldsymbol{\beta}_0, \tau_0^2)^T \right] \end{aligned}$$

Also, we have

$$\text{Cov} [\boldsymbol{\varphi}_{1j}(\boldsymbol{\beta}_0, \tau_0^2), \boldsymbol{\varphi}_{2j}(\boldsymbol{\beta}_0, \tau_0^2)] = \sum_j \mathbb{E} \left[ \rho'(t_j(\boldsymbol{\beta}_0, \tau_0^2)) \frac{\partial t_j}{\partial \boldsymbol{\beta}}(\boldsymbol{\beta}_0, \tau_0^2) \rho'(t_j(\boldsymbol{\beta}_0, \tau_0^2)) \right] = 0$$

and

$$\text{Var} [\boldsymbol{\varphi}_{2j}(\boldsymbol{\beta}_0, \tau_0^2)] = p \text{Var} [\rho(Z)]$$

where  $Z \sim N(0, 1)$ . Thus, we can estimate  $B$  as

$$\hat{B} = \begin{pmatrix} \text{Var} [\rho(Z)] \sum_j \frac{\partial t_j}{\partial \boldsymbol{\beta}}(\hat{\boldsymbol{\beta}}, \hat{\tau}^2) \frac{\partial t_j}{\partial \boldsymbol{\beta}}(\hat{\boldsymbol{\beta}}, \hat{\tau}^2)^T & 0 \\ 0 & p \text{Var} [\rho(Z)] \end{pmatrix}$$

Next, we estimate  $A$ . We need to calculate the function of  $\dot{\varphi}(\boldsymbol{\beta}, \tau^2)$ . we have

$$\begin{aligned}\frac{\partial \varphi_{1j}}{\partial \boldsymbol{\beta}} &= \rho''(t_j) \left( \frac{\partial t_j}{\partial \boldsymbol{\beta}} \right) \left( \frac{\partial t_j}{\partial \boldsymbol{\beta}} \right)^T + \rho'(t_j) \frac{\partial^2 t_j}{\partial \boldsymbol{\beta} \partial \boldsymbol{\beta}} \\ \frac{\partial \varphi_{1j}}{\partial \tau^2} &= \rho''(t_j) \left( \frac{\partial t_j}{\partial \tau^2} \right) \left( \frac{\partial t_j}{\partial \boldsymbol{\beta}} \right) + \rho'(t_j) \frac{\partial^2 t_j}{\partial \tau^2 \partial \boldsymbol{\beta}} \\ \frac{\partial \varphi_{2j}}{\partial \boldsymbol{\beta}} &= \boldsymbol{\varphi}_{1j} \\ \frac{\partial \varphi_{2j}}{\partial \tau^2} &= \rho'(t_j) \frac{\partial t_j}{\partial \tau^2}\end{aligned}$$

As

$$\frac{\partial t_j}{\partial \tau^2} = -\frac{1}{2} \frac{t_j}{\sigma_{Y_j}^2 + \boldsymbol{\beta}^T \Sigma_{X_j} \boldsymbol{\beta} - 2\boldsymbol{\beta}^T \Sigma_{X_j Y_j} + \tau^2}$$

we have

$$\mathbb{E} \left[ \frac{\partial \varphi_{2j}}{\partial \tau^2}(\boldsymbol{\beta}_0, \tau_0^2) \right] = -\frac{\mathbb{E}[\rho'(Z)Z]}{2} \sum_j \frac{1}{\sigma_{Y_j}^2 + \boldsymbol{\beta}_0^T \Sigma_{X_j} \boldsymbol{\beta}_0 - 2\boldsymbol{\beta}_0^T \Sigma_{X_j Y_j} + \tau_0^2}$$

$$\begin{aligned}\mathbb{E} \left[ \frac{\partial \varphi_{1j}}{\partial \tau^2}(\boldsymbol{\beta}_0, \tau_0^2) \right] &= \mathbb{E} \left[ \rho'(t_j(\boldsymbol{\beta}_0, \tau_0^2)) \frac{\partial^2 t_j}{\partial \tau^2 \partial \boldsymbol{\beta}}(\boldsymbol{\beta}_0, \tau_0^2) \right] \\ &= \frac{\mathbb{E}[\rho'(Z)Z]}{2} \sum_j \frac{\Sigma_{X_j} \boldsymbol{\beta} - \Sigma_{X_j Y_j}}{(\sigma_{Y_j}^2 + \boldsymbol{\beta}_0^T \Sigma_{X_j} \boldsymbol{\beta}_0 - 2\boldsymbol{\beta}_0^T \Sigma_{X_j Y_j} + \tau_0^2)^2}\end{aligned}$$

We also have

$$\mathbb{E} \left[ \frac{\partial \varphi_{2j}}{\partial \boldsymbol{\beta}}(\boldsymbol{\beta}_0, \tau_0^2) \right] = \mathbf{0}$$

$$\begin{aligned}\mathbb{E} \left[ \frac{\partial \varphi_{1j}}{\partial \boldsymbol{\beta}}(\boldsymbol{\beta}_0, \tau_0^2) \right] &= \mathbb{E}[\rho''(Z)] \mathbb{E} \left[ \sum_j \frac{\partial t_j}{\partial \boldsymbol{\beta}}(\boldsymbol{\beta}_0, \tau_0^2) \frac{\partial t_j}{\partial \boldsymbol{\beta}}(\boldsymbol{\beta}_0, \tau_0^2)^T \right] + \\ &\quad \mathbb{E} \left[ \sum_j \rho'(t_j(\boldsymbol{\beta}_0, \tau_0^2)) \frac{\partial^2 t_j}{\partial \boldsymbol{\beta} \partial \boldsymbol{\beta}}(\boldsymbol{\beta}_0, \tau_0^2) \right]\end{aligned}$$

where we can estimate the last two expectations on the right hand side by the corresponding sample means.
